# Supplementary material for: Effect of Diurnal Variation of Heart Rate and Respiratory Rate on Activation of Rapid Response System and Clinical Outcome in Hospitalized Children
Source: MDPI journal article supplement (doi:10.3390/children10010167), 2023-01-14
Supplement: s1 [file s1]

**Table S1.** Distribution of underlying diseases among study subjects

| Disease category                | No. of patients (%) |
|---------------------------------|---------------------|
| Behavioral disorder             | 180 (0.7)           |
| Congenital and genetic disorder | 4,670 (17.3)        |
| Dermatologic disease            | 398 (1.5)           |
| Endocrinologic disease          | 1,679 (6.2)         |
| Gastrointestinal disease        | 2,591 (9.6)         |
| Genitourinary disease           | 1,254 (4.7)         |
| Hemato-oncologic disease        | 5,665 (21)          |
| Infectious disease              | 703 (2.6)           |
| Injury and intoxication         | 899 (3.3)           |
| Musculoskeletal disease         | 1,347 (5)           |
| Neurologic disease              | 2,126 (7.9)         |
| Ophthalmic and otologic disease | 1,031 (3.8)         |
| Others                          | 4,380 (16.3)        |

All diseases diagnosed by the patient are included, and there may be more than one diagnosis pertaining to an individual.

**Table S2.** Heart rate centiles by age during the daytime (from 8:00 to 20:00)

| Age           | Centile |     |     |      |      |      |      |      |      |      |      |      |      |
|---------------|---------|-----|-----|------|------|------|------|------|------|------|------|------|------|
|               | 1st     | 3rd | 5th | 10th | 15th | 25th | 50th | 75th | 85th | 90th | 95th | 97th | 99th |
| 0–<3 months   | 118     | 123 | 127 | 131  | 135  | 140  | 149  | 158  | 162  | 166  | 171  | 174  | 180  |
| 3–<6 months   | 112     | 117 | 120 | 124  | 127  | 132  | 140  | 149  | 153  | 156  | 161  | 164  | 169  |
| 6–<9 months   | 104     | 110 | 113 | 117  | 120  | 125  | 133  | 141  | 146  | 149  | 153  | 156  | 162  |
| 9–<12 months  | 101     | 106 | 109 | 114  | 117  | 121  | 129  | 138  | 142  | 145  | 150  | 153  | 158  |
| 12–<15 months | 99      | 104 | 107 | 112  | 115  | 119  | 128  | 136  | 140  | 143  | 148  | 151  | 156  |
| 15–<18 months | 98      | 103 | 106 | 110  | 113  | 118  | 126  | 135  | 139  | 142  | 146  | 149  | 155  |
| 18–<21 months | 96      | 102 | 105 | 109  | 112  | 116  | 125  | 133  | 137  | 140  | 145  | 148  | 153  |
| 21–<24 months | 94      | 100 | 103 | 107  | 110  | 115  | 123  | 131  | 136  | 139  | 143  | 146  | 152  |
| 2–<3 years    | 93      | 98  | 101 | 105  | 108  | 113  | 121  | 129  | 134  | 137  | 141  | 144  | 150  |
| 3–<4 years    | 86      | 91  | 94  | 98   | 101  | 106  | 114  | 122  | 127  | 130  | 134  | 137  | 143  |
| 4–<5 years    | 81      | 86  | 89  | 94   | 97   | 101  | 109  | 117  | 122  | 125  | 129  | 132  | 138  |
| 5–<6 years    | 78      | 83  | 86  | 91   | 94   | 98   | 106  | 114  | 119  | 122  | 126  | 129  | 135  |
| 6–<7 years    | 76      | 81  | 84  | 89   | 92   | 96   | 104  | 112  | 117  | 120  | 124  | 127  | 133  |
| 7–<8 years    | 74      | 80  | 83  | 87   | 90   | 94   | 103  | 111  | 115  | 118  | 123  | 125  | 131  |
| 8–<9 years    | 73      | 78  | 81  | 85   | 88   | 93   | 101  | 109  | 114  | 117  | 121  | 124  | 129  |
| 9–<10 years   | 71      | 77  | 79  | 84   | 87   | 91   | 99   | 108  | 112  | 115  | 119  | 122  | 128  |
| 10–<11 years  | 69      | 75  | 78  | 82   | 85   | 90   | 98   | 106  | 110  | 113  | 118  | 121  | 126  |
| 11–<12 years  | 68      | 73  | 76  | 80   | 83   | 88   | 96   | 104  | 109  | 112  | 116  | 119  | 124  |
| 12–<13 years  | 66      | 71  | 74  | 79   | 82   | 86   | 94   | 102  | 107  | 110  | 114  | 117  | 122  |
| 13–<14 years  | 64      | 70  | 73  | 77   | 80   | 84   | 92   | 101  | 105  | 108  | 112  | 115  | 121  |
| 14–<15 years  | 62      | 68  | 71  | 75   | 78   | 82   | 91   | 99   | 103  | 106  | 111  | 113  | 119  |
| 15–<16 years  | 61      | 66  | 69  | 73   | 76   | 81   | 89   | 97   | 101  | 104  | 109  | 112  | 117  |
| 16–<17 years  | 59      | 64  | 67  | 72   | 74   | 79   | 87   | 95   | 100  | 103  | 107  | 110  | 115  |
| 17–<18 years  | 57      | 62  | 65  | 70   | 73   | 77   | 85   | 93   | 98   | 101  | 105  | 108  | 113  |

**Table S3.** Heart rate centiles by age during the nighttime (from 20:00 to 8:00 the next day)

| Age           | Centile |     |     |      |      |      |      |      |      |      |      |      |      |
|---------------|---------|-----|-----|------|------|------|------|------|------|------|------|------|------|
|               | 1st     | 3rd | 5th | 10th | 15th | 25th | 50th | 75th | 85th | 90th | 95th | 97th | 99th |
| 0–<3 months   | 112     | 118 | 122 | 127  | 131  | 137  | 147  | 157  | 162  | 166  | 171  | 175  | 181  |
| 3–<6 months   | 103     | 109 | 112 | 117  | 120  | 125  | 134  | 143  | 148  | 151  | 156  | 159  | 165  |
| 6–<9 months   | 96      | 102 | 105 | 110  | 113  | 118  | 127  | 135  | 140  | 143  | 148  | 151  | 157  |
| 9–<12 months  | 91      | 97  | 100 | 105  | 108  | 113  | 122  | 131  | 135  | 139  | 143  | 146  | 152  |
| 12–<15 months | 88      | 94  | 97  | 102  | 105  | 110  | 119  | 128  | 132  | 136  | 140  | 144  | 149  |
| 15–<18 months | 87      | 93  | 96  | 100  | 104  | 108  | 117  | 126  | 131  | 134  | 139  | 142  | 148  |
| 18–<21 months | 85      | 91  | 94  | 99   | 102  | 107  | 116  | 125  | 129  | 133  | 137  | 140  | 146  |
| 21–<24 months | 84      | 90  | 93  | 98   | 101  | 106  | 114  | 123  | 128  | 131  | 136  | 139  | 145  |
| 2–<3 years    | 83      | 89  | 92  | 96   | 100  | 104  | 113  | 122  | 127  | 130  | 135  | 138  | 143  |
| 3–<4 years    | 77      | 83  | 86  | 91   | 94   | 99   | 107  | 116  | 121  | 124  | 129  | 132  | 137  |
| 4–<5 years    | 72      | 78  | 81  | 86   | 89   | 94   | 102  | 111  | 116  | 119  | 124  | 127  | 133  |
| 5–<6 years    | 69      | 75  | 78  | 83   | 86   | 91   | 99   | 108  | 113  | 116  | 121  | 124  | 129  |
| 6–<7 years    | 68      | 74  | 77  | 81   | 84   | 89   | 98   | 106  | 111  | 114  | 119  | 122  | 128  |
| 7–<8 years    | 67      | 72  | 75  | 80   | 83   | 88   | 97   | 105  | 110  | 113  | 118  | 121  | 126  |
| 8–<9 years    | 66      | 71  | 74  | 79   | 82   | 87   | 96   | 104  | 109  | 112  | 117  | 120  | 125  |
| 9–<10 years   | 65      | 70  | 73  | 78   | 81   | 86   | 94   | 103  | 108  | 111  | 115  | 118  | 124  |
| 10–<11 years  | 63      | 69  | 72  | 77   | 80   | 84   | 93   | 102  | 106  | 109  | 114  | 117  | 123  |
| 11–<12 years  | 62      | 67  | 70  | 75   | 78   | 83   | 91   | 100  | 105  | 108  | 113  | 116  | 121  |
| 12–<13 years  | 60      | 66  | 69  | 73   | 77   | 81   | 90   | 98   | 103  | 106  | 111  | 114  | 120  |
| 13–<14 years  | 58      | 64  | 67  | 72   | 75   | 79   | 88   | 97   | 101  | 104  | 109  | 112  | 118  |
| 14–<15 years  | 57      | 62  | 65  | 70   | 73   | 78   | 86   | 95   | 99   | 103  | 107  | 110  | 116  |
| 15–<16 years  | 55      | 61  | 64  | 68   | 71   | 76   | 84   | 93   | 98   | 101  | 105  | 108  | 114  |
| 16–<17 years  | 53      | 59  | 62  | 66   | 70   | 74   | 83   | 91   | 96   | 99   | 104  | 107  | 112  |
| 17–<18 years  | 51      | 57  | 60  | 65   | 68   | 72   | 81   | 90   | 94   | 97   | 102  | 105  | 111  |

**Table S4.** Respiratory rate centiles by age during the daytime (from 8:00 to 20:00)

| Age           | Centile |     |     |      |      |      |      |      |      |      |      |      |      |
|---------------|---------|-----|-----|------|------|------|------|------|------|------|------|------|------|
|               | 1st     | 3rd | 5th | 10th | 15th | 25th | 50th | 75th | 85th | 90th | 95th | 97th | 99th |
| 0–<3 months   | 26      | 28  | 30  | 32   | 33   | 35   | 39   | 43   | 45   | 47   | 49   | 50   | 53   |
| 3–<6 months   | 23      | 25  | 27  | 29   | 30   | 32   | 36   | 39   | 41   | 42   | 44   | 46   | 48   |
| 6–<9 months   | 22      | 24  | 25  | 27   | 28   | 30   | 33   | 37   | 39   | 40   | 42   | 43   | 45   |
| 9–<12 months  | 21      | 23  | 24  | 26   | 27   | 29   | 32   | 35   | 37   | 38   | 40   | 41   | 43   |
| 12–<15 months | 20      | 22  | 23  | 25   | 26   | 28   | 31   | 34   | 35   | 36   | 38   | 39   | 41   |
| 15–<18 months | 20      | 22  | 23  | 24   | 25   | 27   | 30   | 33   | 34   | 35   | 37   | 38   | 40   |
| 18–<21 months | 20      | 21  | 22  | 24   | 25   | 26   | 29   | 32   | 33   | 34   | 36   | 37   | 38   |
| 21–<24 months | 19      | 21  | 22  | 23   | 24   | 26   | 28   | 31   | 32   | 33   | 35   | 36   | 37   |
| 2–<3 years    | 19      | 20  | 21  | 22   | 23   | 24   | 26   | 29   | 30   | 31   | 32   | 33   | 34   |
| 3–<4 years    | 18      | 20  | 20  | 21   | 22   | 23   | 25   | 27   | 28   | 29   | 30   | 31   | 32   |
| 4–<5 years    | 18      | 19  | 20  | 21   | 22   | 22   | 24   | 26   | 27   | 28   | 29   | 29   | 31   |
| 5–<6 years    | 18      | 19  | 20  | 20   | 21   | 22   | 24   | 25   | 26   | 27   | 28   | 28   | 29   |
| 6–<7 years    | 18      | 19  | 19  | 20   | 21   | 21   | 23   | 25   | 25   | 26   | 27   | 27   | 28   |
| 7–<8 years    | 18      | 19  | 19  | 20   | 20   | 21   | 23   | 24   | 25   | 25   | 26   | 27   | 27   |
| 8–<9 years    | 17      | 18  | 19  | 20   | 20   | 21   | 22   | 23   | 24   | 25   | 25   | 26   | 27   |
| 9–<10 years   | 17      | 18  | 19  | 19   | 20   | 20   | 22   | 23   | 24   | 24   | 25   | 25   | 26   |
| 10–<11 years  | 17      | 18  | 18  | 19   | 20   | 20   | 21   | 23   | 23   | 24   | 24   | 25   | 26   |
| 11–<12 years  | 17      | 18  | 18  | 19   | 19   | 20   | 21   | 22   | 23   | 23   | 24   | 24   | 25   |
| 12–<13 years  | 17      | 18  | 18  | 19   | 19   | 20   | 21   | 22   | 23   | 23   | 24   | 24   | 25   |
| 13–<14 years  | 17      | 18  | 18  | 19   | 19   | 20   | 21   | 22   | 22   | 23   | 23   | 24   | 24   |
| 14–<15 years  | 17      | 18  | 18  | 19   | 19   | 19   | 20   | 22   | 22   | 22   | 23   | 23   | 24   |
| 15–<16 years  | 17      | 18  | 18  | 18   | 19   | 19   | 20   | 21   | 22   | 22   | 23   | 23   | 24   |
| 16–<17 years  | 17      | 18  | 18  | 18   | 19   | 19   | 20   | 21   | 22   | 22   | 22   | 23   | 23   |
| 17–<18 years  | 17      | 17  | 18  | 18   | 19   | 19   | 20   | 21   | 21   | 22   | 22   | 23   | 23   |

**Table S5.** Respiratory rate centiles by age during the nighttime (from 20:00 to 8:00 the next day)

| Age           | Centile |     |     |      |      |      |      |      |      |      |      |      |      |
|---------------|---------|-----|-----|------|------|------|------|------|------|------|------|------|------|
|               | 1st     | 3rd | 5th | 10th | 15th | 25th | 50th | 75th | 85th | 90th | 95th | 97th | 99th |
| 0–<3 months   | 32      | 35  | 37  | 39   | 40   | 43   | 47   | 51   | 54   | 55   | 57   | 59   | 62   |
| 3–<6 months   | 25      | 27  | 29  | 31   | 32   | 35   | 39   | 43   | 45   | 47   | 49   | 50   | 53   |
| 6–<9 months   | 22      | 25  | 26  | 28   | 29   | 31   | 35   | 39   | 41   | 42   | 44   | 45   | 48   |
| 9–<12 months  | 21      | 23  | 25  | 26   | 28   | 29   | 33   | 36   | 38   | 39   | 41   | 42   | 44   |
| 12–<15 months | 21      | 23  | 24  | 25   | 26   | 28   | 31   | 34   | 36   | 37   | 39   | 40   | 42   |
| 15–<18 months | 20      | 22  | 23  | 25   | 26   | 27   | 30   | 33   | 35   | 36   | 37   | 38   | 40   |
| 18–<21 months | 20      | 22  | 22  | 24   | 25   | 26   | 29   | 32   | 33   | 34   | 36   | 37   | 39   |
| 21–<24 months | 19      | 21  | 22  | 23   | 24   | 26   | 28   | 31   | 32   | 33   | 35   | 36   | 38   |
| 2–<3 years    | 19      | 21  | 22  | 23   | 24   | 25   | 28   | 30   | 32   | 33   | 34   | 35   | 36   |
| 3–<4 years    | 19      | 20  | 21  | 22   | 23   | 24   | 26   | 28   | 29   | 30   | 31   | 32   | 34   |
| 4–<5 years    | 18      | 19  | 20  | 21   | 22   | 23   | 25   | 27   | 28   | 29   | 30   | 30   | 32   |
| 5–<6 years    | 18      | 19  | 20  | 21   | 21   | 22   | 24   | 26   | 27   | 27   | 28   | 29   | 30   |
| 6–<7 years    | 18      | 19  | 19  | 20   | 21   | 22   | 23   | 25   | 26   | 26   | 27   | 28   | 29   |
| 7–<8 years    | 18      | 19  | 19  | 20   | 20   | 21   | 23   | 24   | 25   | 26   | 27   | 27   | 28   |
| 8–<9 years    | 17      | 18  | 19  | 20   | 20   | 21   | 22   | 24   | 25   | 25   | 26   | 26   | 27   |
| 9–<10 years   | 17      | 18  | 19  | 19   | 20   | 21   | 22   | 23   | 24   | 25   | 25   | 26   | 27   |
| 10–<11 years  | 17      | 18  | 18  | 19   | 20   | 20   | 22   | 23   | 24   | 24   | 25   | 25   | 26   |
| 11–<12 years  | 17      | 18  | 18  | 19   | 19   | 20   | 21   | 23   | 23   | 24   | 24   | 25   | 26   |
| 12–<13 years  | 17      | 18  | 18  | 19   | 19   | 20   | 21   | 22   | 23   | 23   | 24   | 24   | 25   |
| 13–<14 years  | 17      | 18  | 18  | 19   | 19   | 20   | 21   | 22   | 23   | 23   | 24   | 24   | 25   |
| 14–<15 years  | 17      | 18  | 18  | 19   | 19   | 20   | 21   | 22   | 22   | 23   | 23   | 24   | 24   |
| 15–<16 years  | 17      | 17  | 18  | 18   | 19   | 19   | 20   | 22   | 22   | 22   | 23   | 23   | 24   |
| 16–<17 years  | 17      | 17  | 18  | 18   | 19   | 19   | 20   | 21   | 22   | 22   | 23   | 23   | 24   |
| 17–<18 years  | 17      | 17  | 18  | 18   | 19   | 19   | 20   | 21   | 22   | 22   | 23   | 23   | 24   |

**Table S6.** Regression analyses between underlying diseases and z-scores differences of HR and RR by age

| Variables                     | Z-score of HR by age |       |        | Z-score of RR by age |       |       |
|-------------------------------|----------------------|-------|--------|----------------------|-------|-------|
|                               | Estimate             | SE    | P      | Estimate             | SE    | P     |
| Others                        | Reference            |       |        | Reference            |       |       |
| Behavioral disorder           | 0.073                | 0.052 | 0.159  | 0.069                | 0.039 | 0.074 |
| Congenital & genetic disorder | 0.089                | 0.023 | <0.001 | 0.033                | 0.017 | 0.059 |
| Dermatologic disease          | -0.059               | 0.035 | 0.094  | 0.026                | 0.026 | 0.319 |
| Endocrinologic disease        | 0.004                | 0.02  | 0.828  | 0.030                | 0.015 | 0.048 |
| Gastrointestinal disease      | 0.040                | 0.018 | 0.026  | 0.024                | 0.013 | 0.072 |
| Hemato-oncologic disease      | 0.062                | 0.012 | <0.001 | 0.012                | 0.009 | 0.174 |
| Infectious disease            | 0.069                | 0.028 | 0.012  | 0.009                | 0.021 | 0.668 |
| Injury & intoxication         | -0.006               | 0.025 | 0.793  | 0.017                | 0.018 | 0.346 |
| Musculoskeletal disease       | -0.004               | 0.021 | 0.852  | 0.022                | 0.016 | 0.168 |
| Neurologic disease            | -0.006               | 0.018 | 0.732  | 0.016                | 0.013 | 0.233 |
| Ophthalmic & otologic disease | -0.074               | 0.025 | 0.003  | 0.008                | 0.019 | 0.687 |

The difference of each measurement was defined as the nighttime measurement minus the daytime measurement. Daytime was defined as 8:00 to 20:00, and nighttime was defined as 20:00 to 8:00 the next day.

HR = heart rate, RR = respiratory rate, SE = standard error

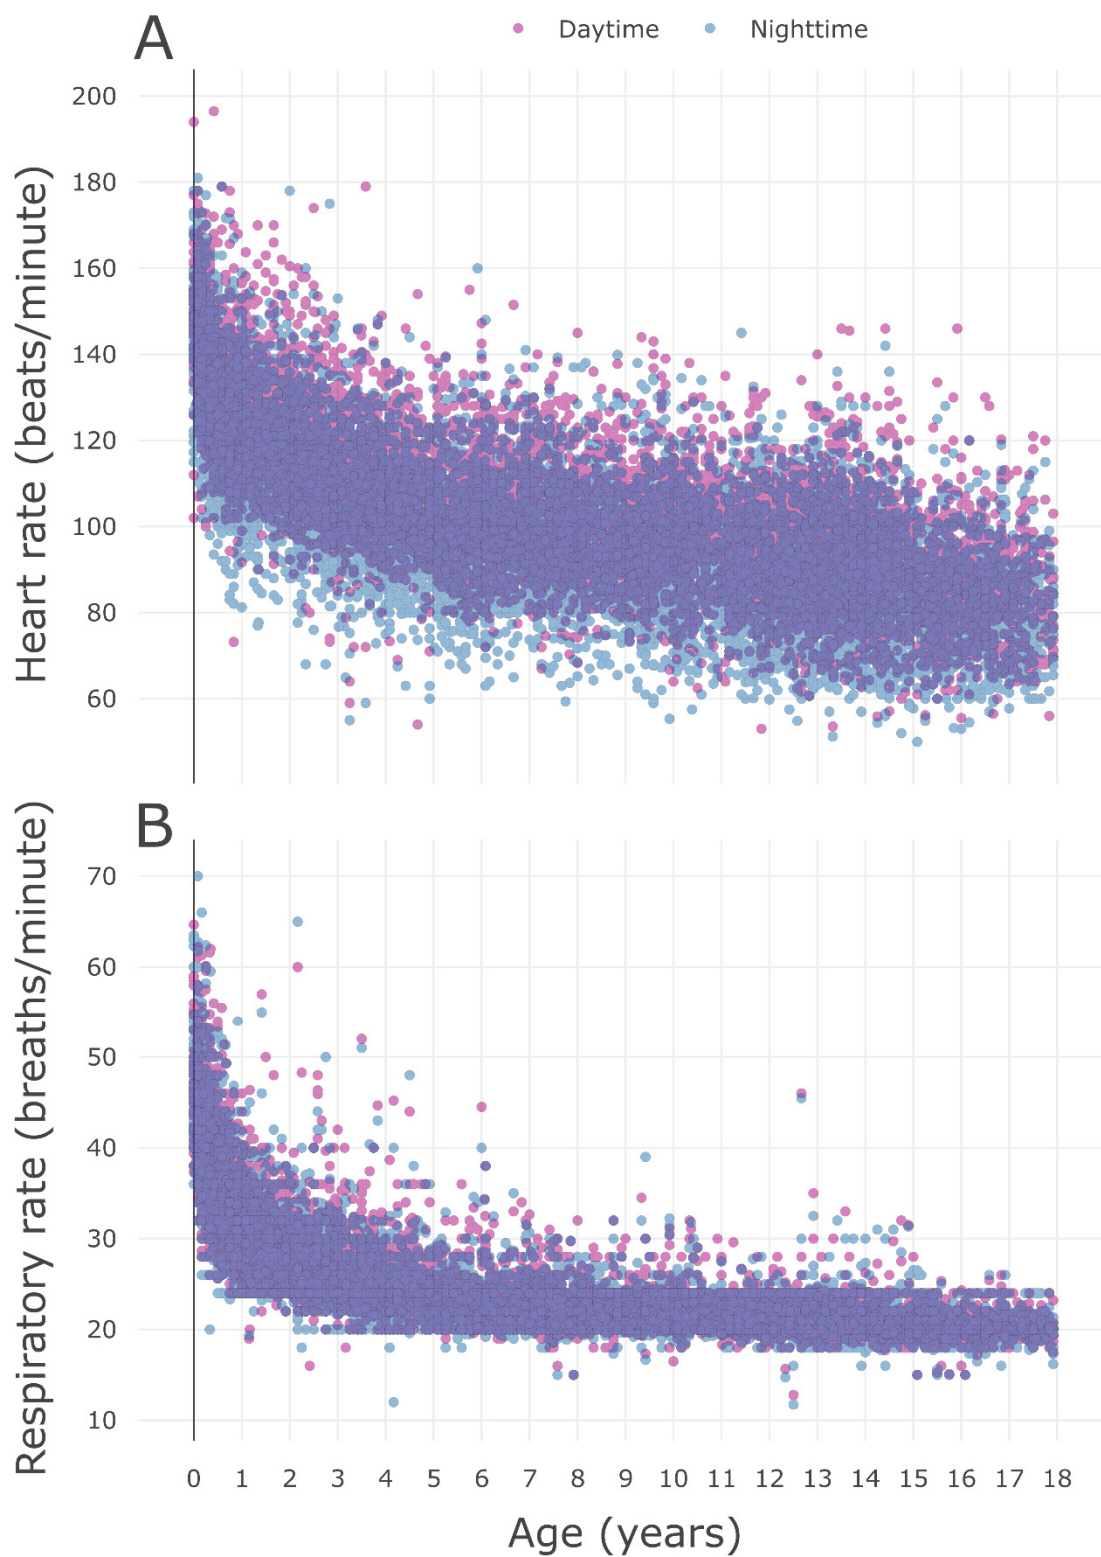

**Figure S1.** Scatter plot of vital signs by time period

The distribution of (A) heart rate and (B) respiratory rate is shown. Daytime was defined as 8:00 to 20:00, and nighttime was defined as 20:00 to 8:00 the next day.

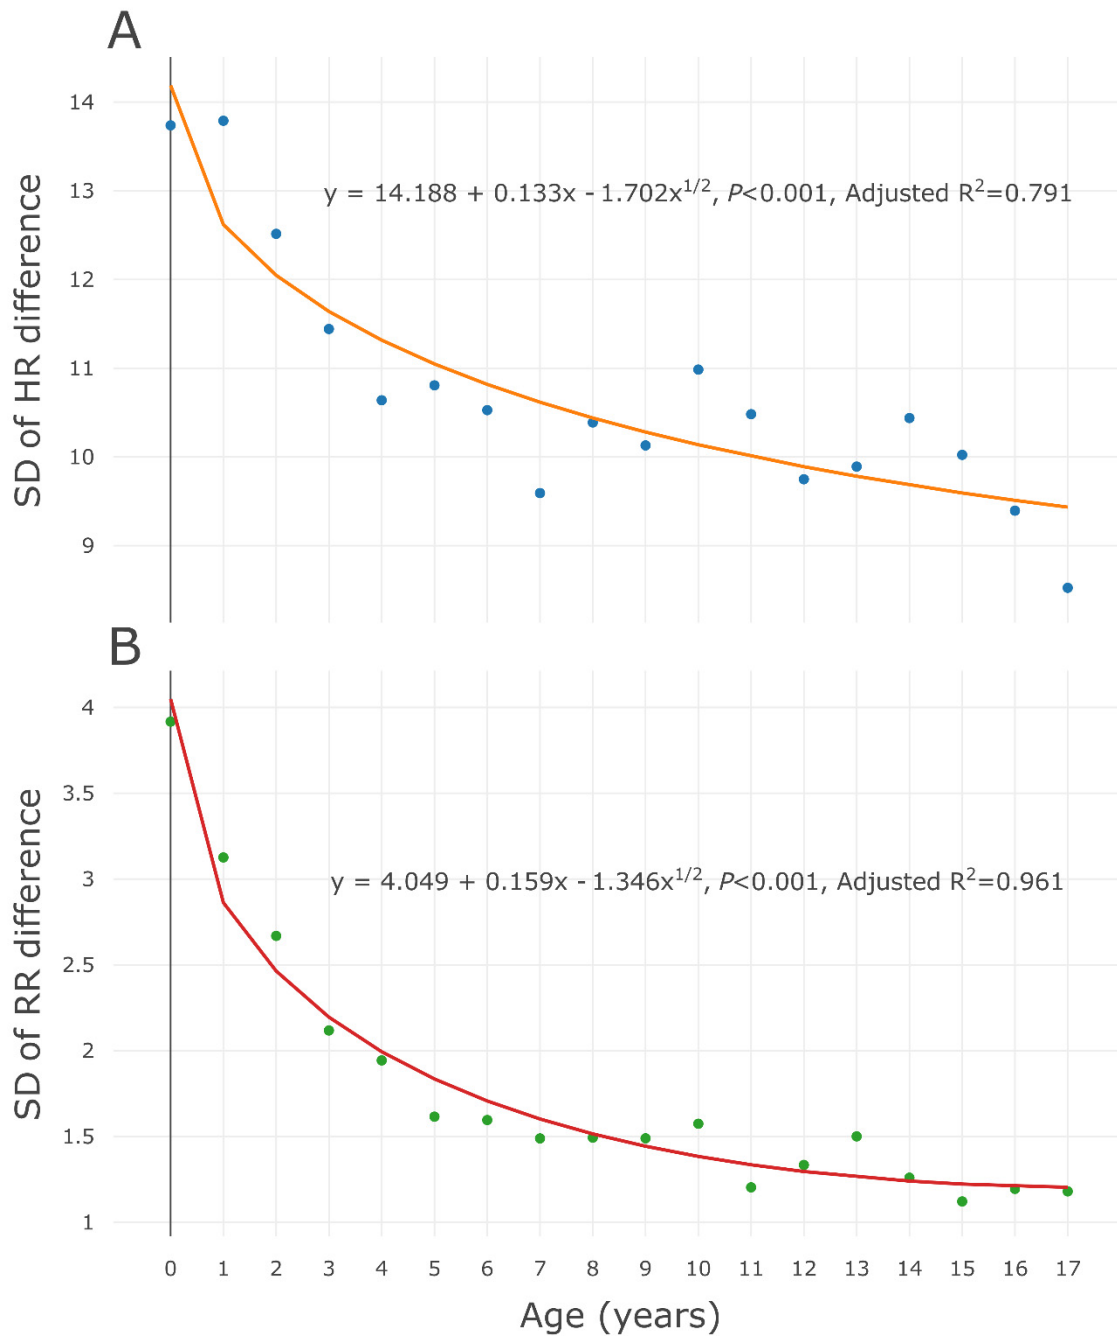

**Figure S2.** SD changes of differences in vital signs by age

The difference in vital signs was defined as the value obtained by subtracting the measured value of daytime from the measured value of nighttime. Nighttime was defined as from 8:00 pm to 8:00 am the next day, and daytime was defined as from 8:00 am to 8:00 pm. (A) SD of HR difference by age, and (B) SD of RR difference. Both HR and RR differences show a statistically significant decrease as age increases.

SD = standard deviation, HR = heart rate, RR = respiratory rate



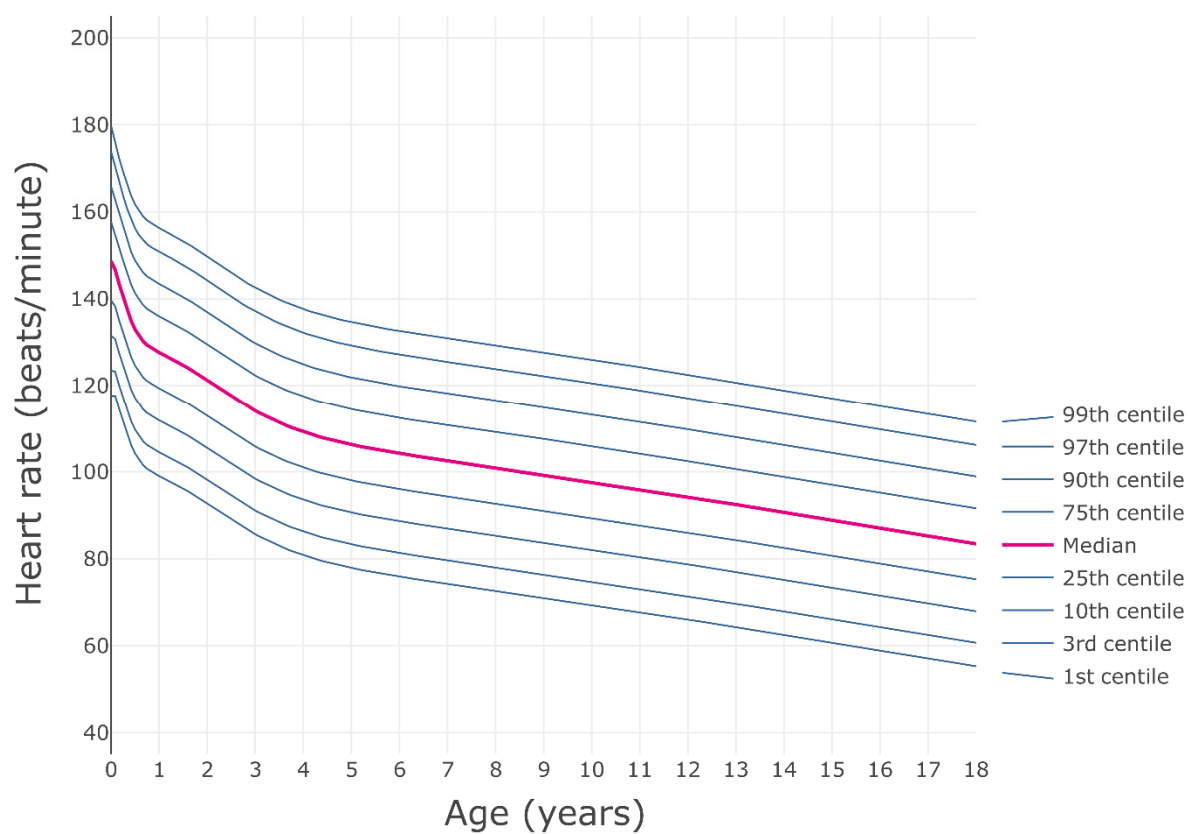

**Figure S3.** Centile curve of heart rate by age in the daytime (from 8:00 to 20:00)

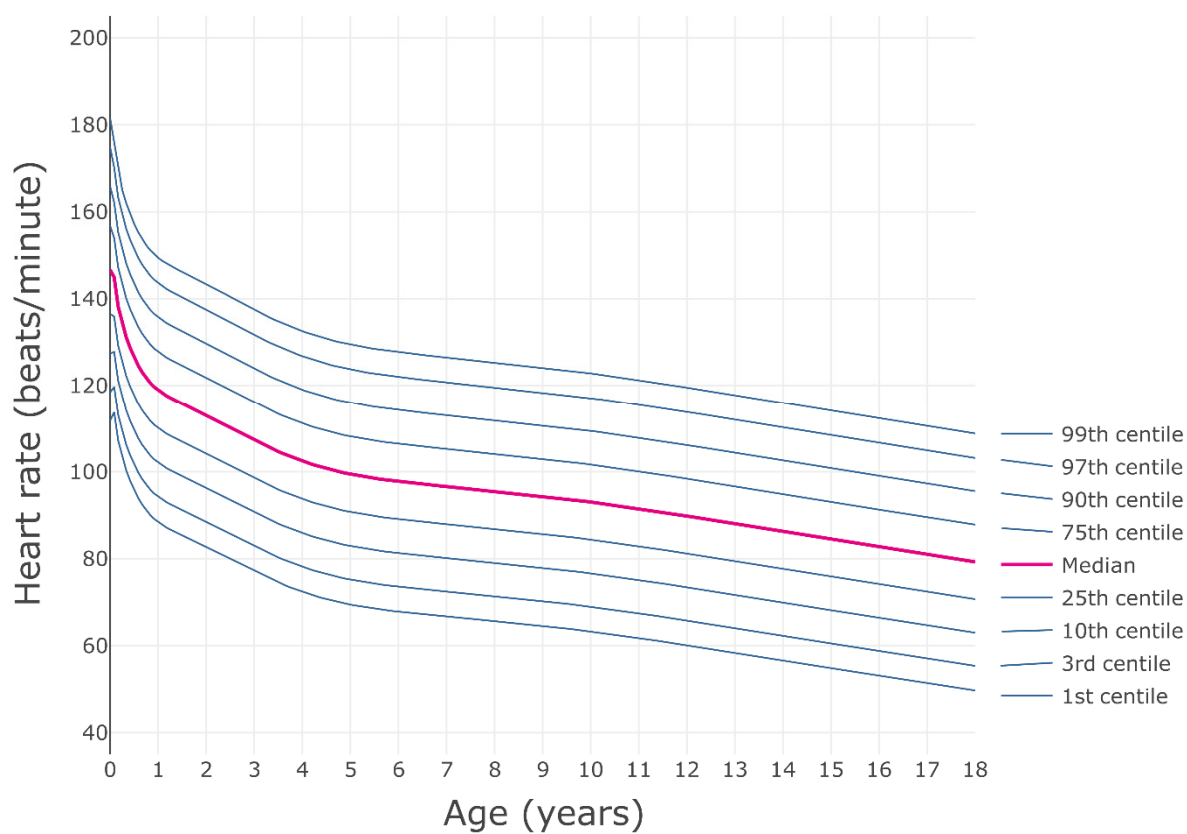

**Figure S4.** Centile curve of heart rate by age in the nighttime (from 20:00 to 8:00 the next day)

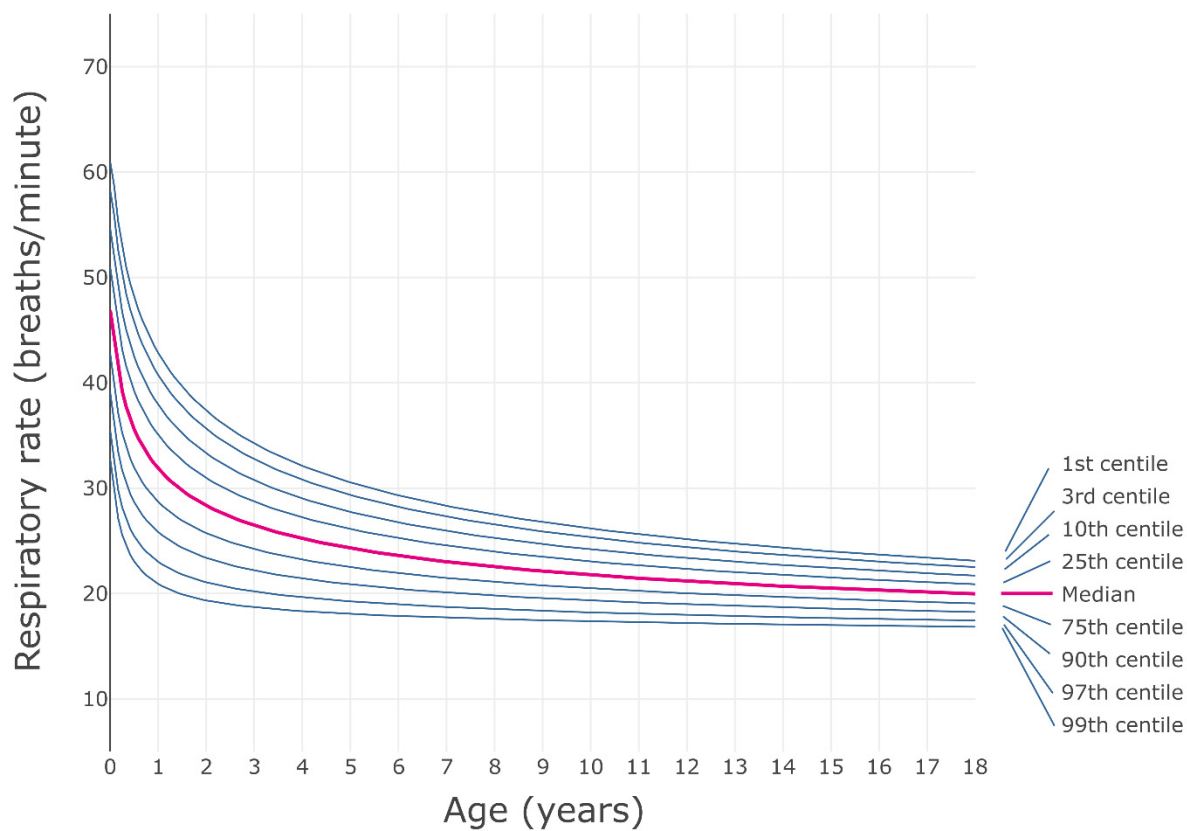

**Figure S5.** Centile curve of respiratory rate by age in the daytime (from 8:00 to 20:00)

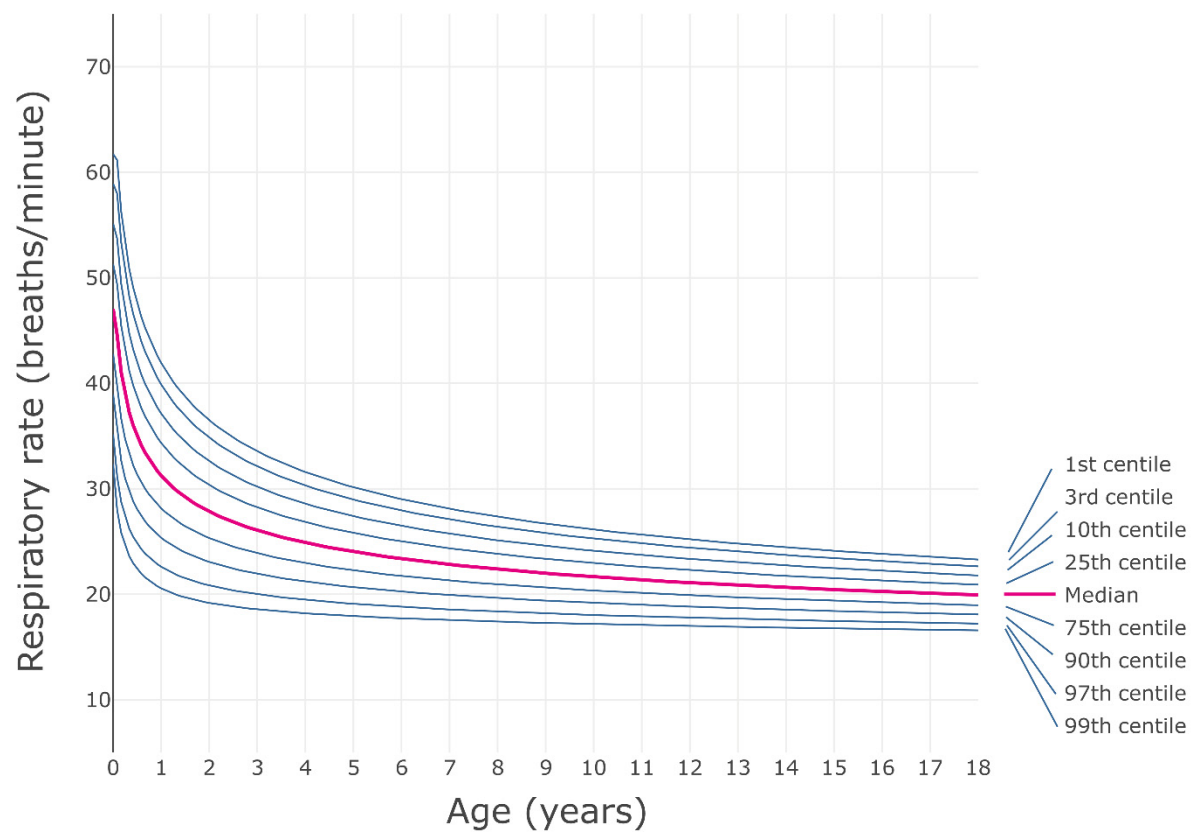

**Figure S6.** Centile curve of respiratory rate by age in the nighttime (from 20:00 to 8:00 the next day)

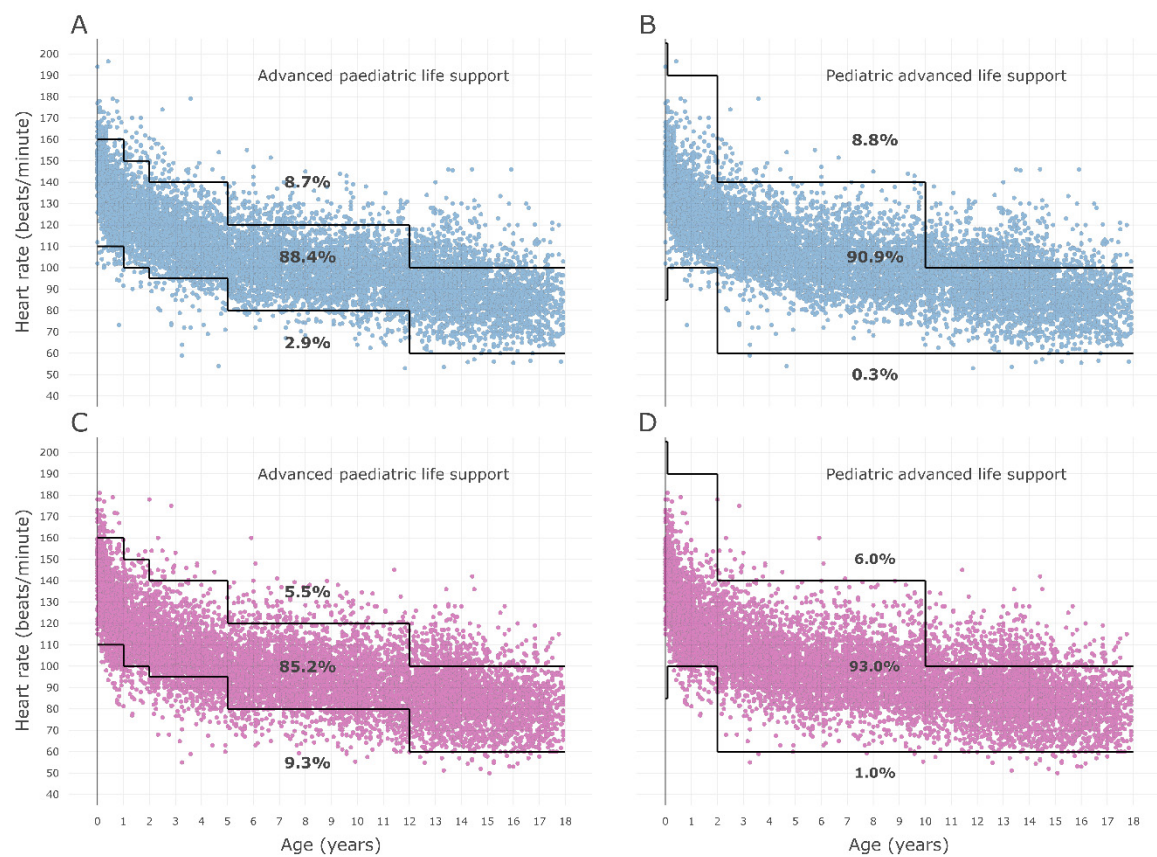

**Figure S7.** Centile curves for heart rate by age

Centile curves of heart rate by age with visual comparison against the centile curves from advanced paediatric life support (A and C) and paediatric advanced life support (B and D) guidelines. Scatter plots of daytime (A and B) and nighttime (C and D)

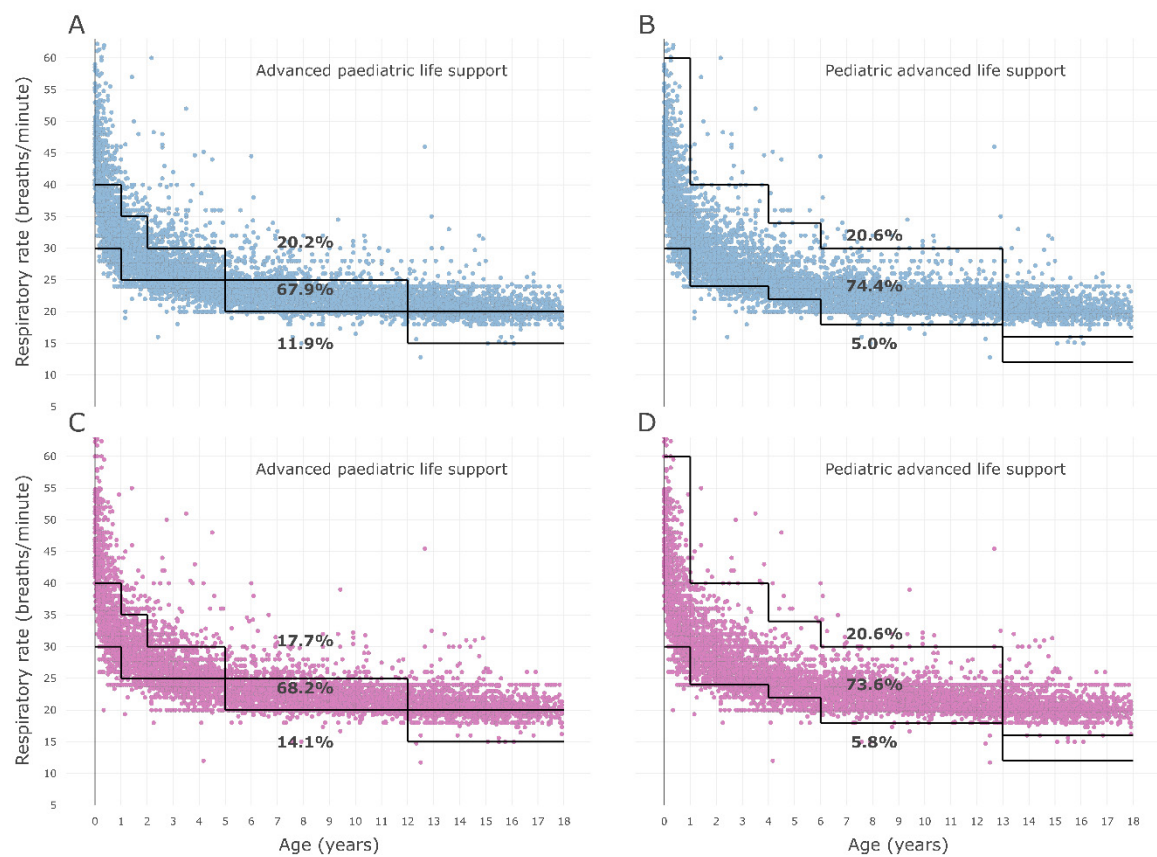

**Figure S8.** Centile curves for respiratory rate by age

Centile curves of respiratory rate by age with visual comparison against the centile curves from advanced pediatric life support (A) and pediatric advanced life support (B) guidelines. Scatter plots of daytime (A and B) and nighttime (C and D)
